# Supplementary material for: Telmisartan Lowers Elevated Blood Pressure in Psoriatic Mice without Attenuating Vascular Dysfunction and Inflammation
Source: MDPI journal article supplement (doi:10.3390/ijms20174261), 2019-08-30
Supplement: s1 [file s1]

Supplement

a

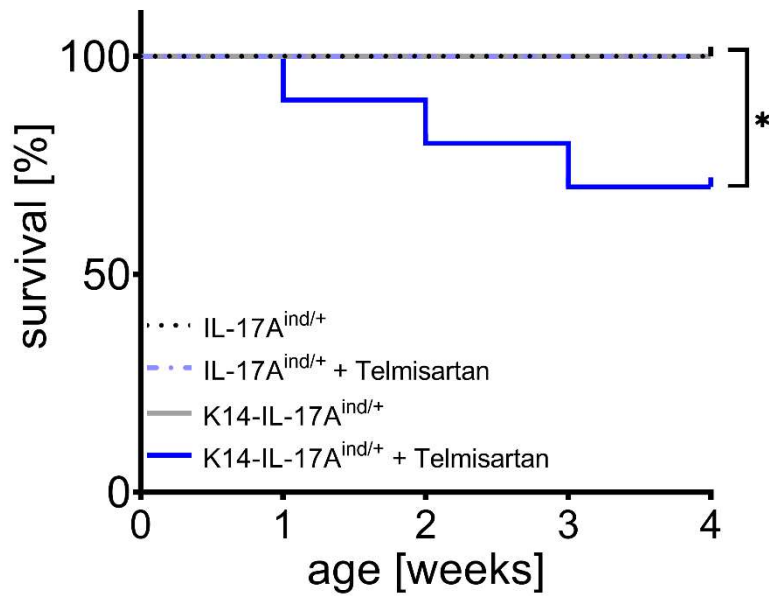

b

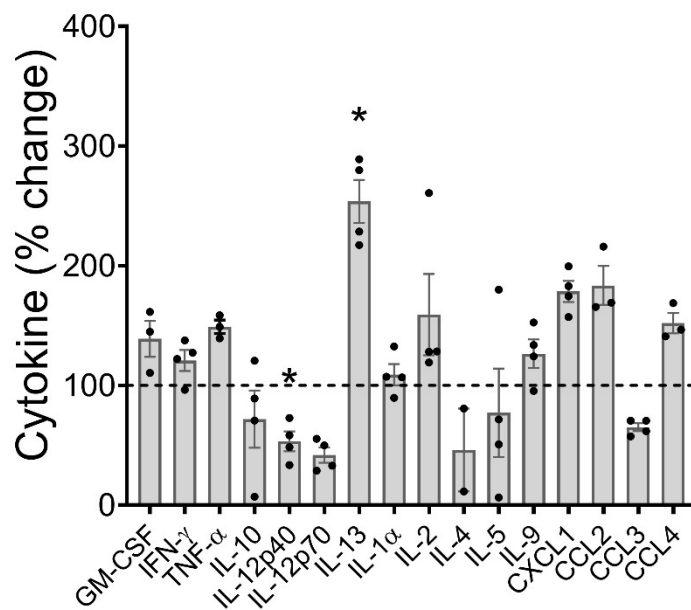

Supplementary Figure 1:

(a) Kaplan-Meier survival curve of K14-IL-17A<sup>ind/+</sup> and control mice with and without telmisartan treatment, n = 7-10 mice per group, Mantel-Cox test. (b) Cytokine profile in plasma of K14-IL-17A<sup>ind/+</sup> mice. Data was generated using the Bio-Plex assay kit in plasma of mice. IL-17A<sup>ind/+</sup> control mice were normalized to 100% (indicated with the dashed line), percentual change compared to control is shown for K14-IL-17A<sup>ind/+</sup> mice, n = 3-6, either Student's unpaired t-test or Mann-Whitney t-test. Data are presented as mean  $\pm$  SEM.
